# Supplementary material
Source: PubMed Central journal article supplement (PMC11467825)
Supplement: NIHMS2025961-supplement-1.pdf [file NIHMS2025961-supplement-1.pdf]

| Supplemental Table 1. Individual tests and normative data used across sites                                                                                                                                                                                                                                                                                                                                                                                                                                                                                                                                                                                                                                                                                                                                                                                                                      |                                             |                                       |                             |                                    |
|--------------------------------------------------------------------------------------------------------------------------------------------------------------------------------------------------------------------------------------------------------------------------------------------------------------------------------------------------------------------------------------------------------------------------------------------------------------------------------------------------------------------------------------------------------------------------------------------------------------------------------------------------------------------------------------------------------------------------------------------------------------------------------------------------------------------------------------------------------------------------------------------------|---------------------------------------------|---------------------------------------|-----------------------------|------------------------------------|
|                                                                                                                                                                                                                                                                                                                                                                                                                                                                                                                                                                                                                                                                                                                                                                                                                                                                                                  | Cleveland Clinic                            | Columbia University                   | New York University         | Medical College of Wisconsin       |
| <b>Language</b>                                                                                                                                                                                                                                                                                                                                                                                                                                                                                                                                                                                                                                                                                                                                                                                                                                                                                  |                                             |                                       |                             |                                    |
| Boston Naming Test                                                                                                                                                                                                                                                                                                                                                                                                                                                                                                                                                                                                                                                                                                                                                                                                                                                                               | Tombaugh & Hubley, 1996 <sup>a</sup>        | Heaton <sup>a,b,c,d</sup>             | Heaton <sup>a,b,c,d</sup>   | Heaton <sup>a,b,c,d</sup>          |
| Auditory Naming Test                                                                                                                                                                                                                                                                                                                                                                                                                                                                                                                                                                                                                                                                                                                                                                                                                                                                             | -                                           | Hamberger & Seidel, 2003 <sup>b</sup> | -                           | -                                  |
| Visual Naming Test                                                                                                                                                                                                                                                                                                                                                                                                                                                                                                                                                                                                                                                                                                                                                                                                                                                                               | -                                           | Hamberger & Seidel, 2003 <sup>b</sup> | -                           | -                                  |
| Animal Fluency                                                                                                                                                                                                                                                                                                                                                                                                                                                                                                                                                                                                                                                                                                                                                                                                                                                                                   | Tombaugh, Kozak & Rees, 1996 <sup>a,b</sup> | Heaton <sup>a,b,c,d</sup>             | Heaton <sup>a,b,c,d</sup>   | Heaton <sup>a,b,c,d</sup>          |
| Letter Fluency                                                                                                                                                                                                                                                                                                                                                                                                                                                                                                                                                                                                                                                                                                                                                                                                                                                                                   | Tombaugh, Kozak & Rees, 1996 <sup>a,b</sup> | Heaton <sup>a,b,c,d</sup>             | Heaton <sup>a,b,c,d</sup>   | Heaton <sup>a,b,c,d</sup>          |
| D-KEFS Fluency                                                                                                                                                                                                                                                                                                                                                                                                                                                                                                                                                                                                                                                                                                                                                                                                                                                                                   | -                                           | Manual <sup>a</sup>                   | -                           | -                                  |
| <b>Memory</b>                                                                                                                                                                                                                                                                                                                                                                                                                                                                                                                                                                                                                                                                                                                                                                                                                                                                                    |                                             |                                       |                             |                                    |
| WMS Logical Memory                                                                                                                                                                                                                                                                                                                                                                                                                                                                                                                                                                                                                                                                                                                                                                                                                                                                               | Manual <sup>a</sup>                         | Manual <sup>a</sup>                   | Manual <sup>a</sup>         | Manual <sup>a</sup>                |
| WMS VPA                                                                                                                                                                                                                                                                                                                                                                                                                                                                                                                                                                                                                                                                                                                                                                                                                                                                                          | Manual <sup>a</sup>                         | -                                     | -                           | -                                  |
| CVLT-II $\infty$                                                                                                                                                                                                                                                                                                                                                                                                                                                                                                                                                                                                                                                                                                                                                                                                                                                                                 | -                                           | Manual <sup>a,b</sup>                 | -                           | -                                  |
| AVLT                                                                                                                                                                                                                                                                                                                                                                                                                                                                                                                                                                                                                                                                                                                                                                                                                                                                                             | Geffen, 1995 <sup>a,c</sup>                 | Schmidt, 1996 <sup>a</sup>            | Geffen, 1995 <sup>a,c</sup> | -                                  |
| WMS Word List                                                                                                                                                                                                                                                                                                                                                                                                                                                                                                                                                                                                                                                                                                                                                                                                                                                                                    | Manual <sup>a</sup>                         | -                                     | -                           | -                                  |
| WMS Faces                                                                                                                                                                                                                                                                                                                                                                                                                                                                                                                                                                                                                                                                                                                                                                                                                                                                                        | Manual <sup>a</sup>                         | -                                     | -                           | -                                  |
| WMS Family                                                                                                                                                                                                                                                                                                                                                                                                                                                                                                                                                                                                                                                                                                                                                                                                                                                                                       | Manual <sup>a</sup>                         | -                                     | -                           | -                                  |
| WMS VR                                                                                                                                                                                                                                                                                                                                                                                                                                                                                                                                                                                                                                                                                                                                                                                                                                                                                           | Manual <sup>a</sup>                         | Manual <sup>a</sup>                   | Manual <sup>a</sup>         | Manual <sup>a</sup>                |
| BVMT $\infty$                                                                                                                                                                                                                                                                                                                                                                                                                                                                                                                                                                                                                                                                                                                                                                                                                                                                                    | -                                           | -                                     | -                           | Manual <sup>a</sup>                |
| RCFT $\infty$                                                                                                                                                                                                                                                                                                                                                                                                                                                                                                                                                                                                                                                                                                                                                                                                                                                                                    | -                                           | -                                     | Manual <sup>a</sup>         | -                                  |
| SRT                                                                                                                                                                                                                                                                                                                                                                                                                                                                                                                                                                                                                                                                                                                                                                                                                                                                                              | -                                           | -                                     | -                           | Rao Manual (1990) <sup>a</sup>     |
| 7/24 $\infty$                                                                                                                                                                                                                                                                                                                                                                                                                                                                                                                                                                                                                                                                                                                                                                                                                                                                                    | -                                           | -                                     | -                           | Rao et al 1991                     |
| <b>Executive Function</b>                                                                                                                                                                                                                                                                                                                                                                                                                                                                                                                                                                                                                                                                                                                                                                                                                                                                        |                                             |                                       |                             |                                    |
| TMT-B                                                                                                                                                                                                                                                                                                                                                                                                                                                                                                                                                                                                                                                                                                                                                                                                                                                                                            | Heaton <sup>a,b,c,d</sup>                   | Heaton <sup>a,b,c,d</sup>             | Heaton <sup>a,b,c,d</sup>   | Heaton <sup>a,b,c,d</sup>          |
| Letter-Number Seq                                                                                                                                                                                                                                                                                                                                                                                                                                                                                                                                                                                                                                                                                                                                                                                                                                                                                | Manual <sup>a</sup>                         | Manual <sup>a</sup>                   | -                           | Manual <sup>a</sup>                |
| WCST                                                                                                                                                                                                                                                                                                                                                                                                                                                                                                                                                                                                                                                                                                                                                                                                                                                                                             | Manual <sup>a,b</sup>                       | -                                     | Manual <sup>a,b</sup>       | Manual <sup>a,b</sup>              |
| DKEFS Stroop CW                                                                                                                                                                                                                                                                                                                                                                                                                                                                                                                                                                                                                                                                                                                                                                                                                                                                                  | -                                           | Manual <sup>a</sup>                   | Manual <sup>a</sup>         | -                                  |
| <b>Visuospatial Abilities</b>                                                                                                                                                                                                                                                                                                                                                                                                                                                                                                                                                                                                                                                                                                                                                                                                                                                                    |                                             |                                       |                             |                                    |
| Block Design*                                                                                                                                                                                                                                                                                                                                                                                                                                                                                                                                                                                                                                                                                                                                                                                                                                                                                    | Manual <sup>a</sup>                         | Manual <sup>a</sup>                   | Manual <sup>a</sup>         | Manual <sup>a</sup>                |
| Matrix Reasoning                                                                                                                                                                                                                                                                                                                                                                                                                                                                                                                                                                                                                                                                                                                                                                                                                                                                                 | Manual <sup>a</sup>                         | Manual <sup>a</sup>                   | Manual <sup>a</sup>         | Manual <sup>a</sup>                |
| Visual Puzzles $\infty$                                                                                                                                                                                                                                                                                                                                                                                                                                                                                                                                                                                                                                                                                                                                                                                                                                                                          | -                                           | -                                     | Manual <sup>a</sup>         | -                                  |
| VR Copy $\infty$                                                                                                                                                                                                                                                                                                                                                                                                                                                                                                                                                                                                                                                                                                                                                                                                                                                                                 | Manual <sup>a</sup>                         | -                                     | -                           | -                                  |
| JOLO                                                                                                                                                                                                                                                                                                                                                                                                                                                                                                                                                                                                                                                                                                                                                                                                                                                                                             | Woodard, 1998 <sup>a</sup>                  | -                                     | -                           | Benton Manual, 1983 <sup>a,c</sup> |
| Benton Face Recog                                                                                                                                                                                                                                                                                                                                                                                                                                                                                                                                                                                                                                                                                                                                                                                                                                                                                | -                                           | -                                     | -                           | Benton Manual, 1983 <sup>a,b</sup> |
| RCFT Copy                                                                                                                                                                                                                                                                                                                                                                                                                                                                                                                                                                                                                                                                                                                                                                                                                                                                                        | -                                           | Manual <sup>a</sup>                   | Manual <sup>a</sup>         | -                                  |
| <b>Attention/Processing Speed</b>                                                                                                                                                                                                                                                                                                                                                                                                                                                                                                                                                                                                                                                                                                                                                                                                                                                                |                                             |                                       |                             |                                    |
| TMT-A                                                                                                                                                                                                                                                                                                                                                                                                                                                                                                                                                                                                                                                                                                                                                                                                                                                                                            | Heaton <sup>a,b,c,d</sup>                   | Heaton <sup>a,b,c,d</sup>             | Heaton <sup>a,b,c,d</sup>   | Heaton <sup>a,b,c,d</sup>          |
| Digit Span                                                                                                                                                                                                                                                                                                                                                                                                                                                                                                                                                                                                                                                                                                                                                                                                                                                                                       | Manual <sup>a</sup>                         | Manual <sup>a</sup>                   | Manual <sup>a</sup>         | Manual <sup>a</sup>                |
| WMS-III Spatial Span                                                                                                                                                                                                                                                                                                                                                                                                                                                                                                                                                                                                                                                                                                                                                                                                                                                                             | Manual <sup>a</sup>                         | -                                     | -                           | -                                  |
| Arithmetic                                                                                                                                                                                                                                                                                                                                                                                                                                                                                                                                                                                                                                                                                                                                                                                                                                                                                       | Manual <sup>a</sup>                         | Manual <sup>a</sup>                   | Manual <sup>a</sup>         | Manual <sup>a</sup>                |
| Coding                                                                                                                                                                                                                                                                                                                                                                                                                                                                                                                                                                                                                                                                                                                                                                                                                                                                                           | Manual <sup>a</sup>                         | -                                     | Manual <sup>a</sup>         | Manual <sup>a</sup>                |
| Symbol Search                                                                                                                                                                                                                                                                                                                                                                                                                                                                                                                                                                                                                                                                                                                                                                                                                                                                                    | Manual <sup>a</sup>                         | -                                     | Manual <sup>a</sup>         | Manual <sup>a</sup>                |
| <p><b>a.</b> Corrected for age; <b>b.</b> Corrected for education; <b>c.</b> Corrected for sex; <b>d.</b> Corrected for race/ethnicity; Norms applied at each site were those used in research studies and to not necessarily the same norms applied clinically.</p> <p>Dash (-) indicates that the test was not administered at the site.<br/>Manual indicates that normative data provided by each test corresponding manual was used.</p> <p>DKEFS: Delis-Kaplan Executive Function System; WMS: Wechsler Memory Scale III or IV; VPA: Verbal Paired Associates; CVLT-II: California Verbal Learning Test-II; AVLT: Auditory Verbal Learning Test; TMT: Trail Making Test; WCST: Wisconsin Card Sorting Test; CW Inh/Swit: Color-Word Inhibition/Switching; Stroop CW: Stroop Color-Word; JOLO: Judgment of Line Orientation; WMS VR Copy: Wechsler Memory Scale Visual Reproduction Copy</p> |                                             |                                       |                             |                                    |

\*Block Design and Matrix Reasoning were administered from the Wechsler Abbreviated Scale of Intelligence (I or II) or Wechsler Adult Intelligence Test-IV (WAIS-IV); Arithmetic, Coding and Symbol Search were from the WAIS-IV.

∞Test was excluded from test impairment analyses because less than 10% of the total sample was administered the test.
